# Supplementary material for: The Soybean bZIP Transcription Factor Gene GmbZIP2 Confers Drought and Salt Resistances in Transgenic Plants
Source: MDPI journal article supplement (doi:10.3390/ijms21020670), 2020-01-20
Supplement: s1 [file s1]

**Supplemental Figure S1.** Phylogenetic tree analysis of 15 soybean bZIPs.

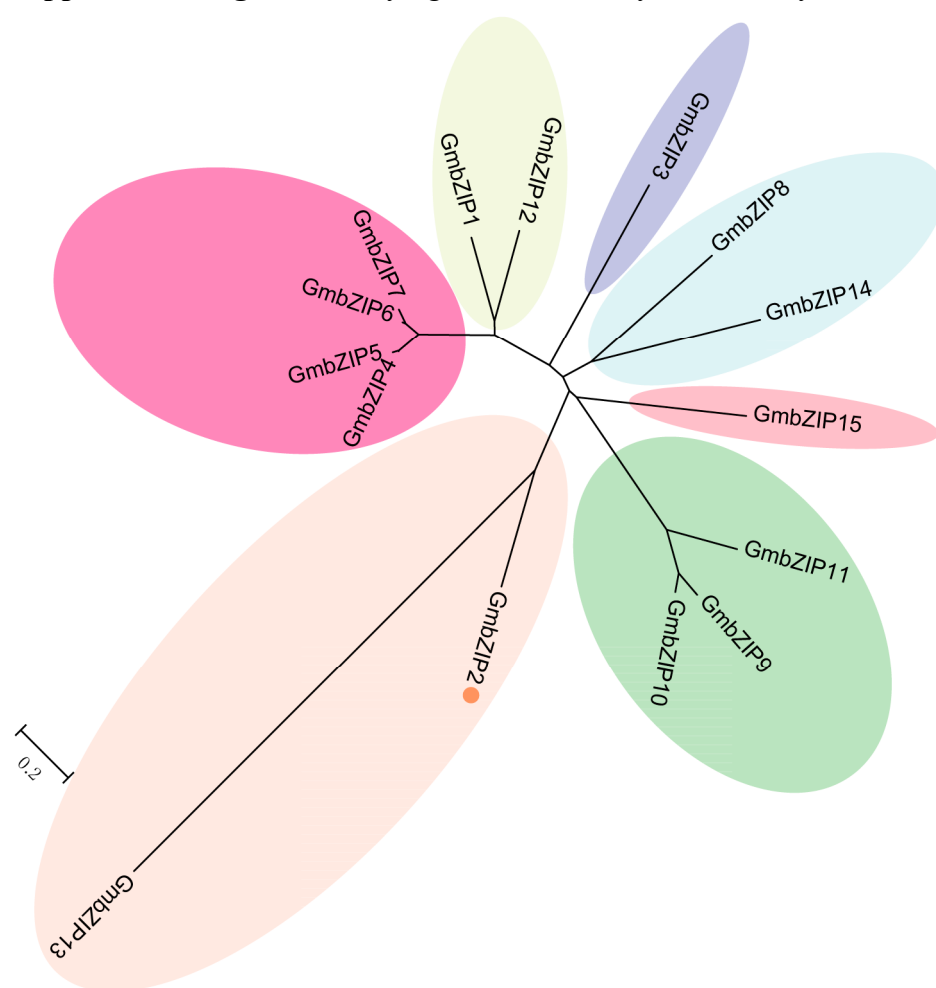

## Supplemental Figure S2. Multiple Sequence Alignment of 15 soybean bZIPs.

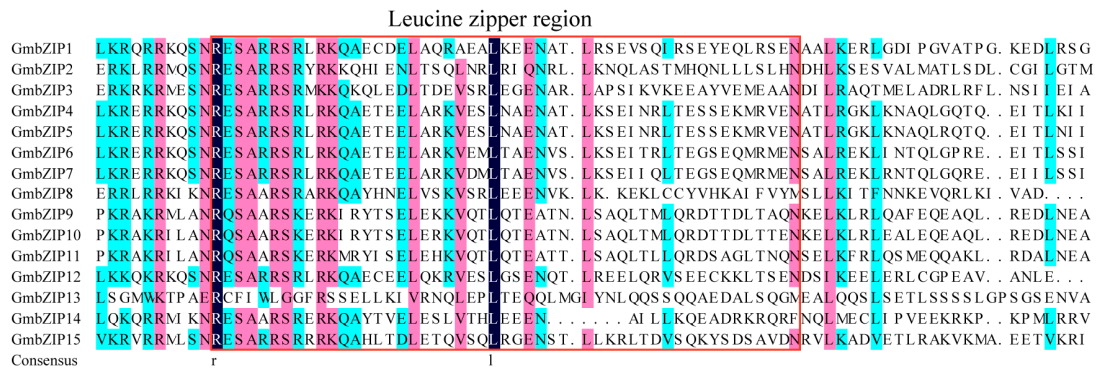

**Supplemental Table S1.** RNA-seq data analyses of 15 soybean bZIPs.

| Gene     | Gene ID           | CK_treat-Expressi<br>on | GH_treat-Expressi<br>on | log2FoldChange(<br>GH_treat/CK_tre<br>at) | P-value  |
|----------|-------------------|-------------------------|-------------------------|-------------------------------------------|----------|
| GmbZIP1  | Glyma.08G265600.1 | 351                     | 763                     | 2.21661                                   | 0.00011  |
| GmbZIP2  | Glyma.06G048500.1 | 2                       | 82                      | 1.94359                                   | 0.03354  |
| GmbZIP3  | Glyma.02G012700.1 | 1195                    | 10915                   | 1.65979                                   | 5.20E-05 |
| GmbZIP4  | Glyma.03G255000.1 | 0.4                     | 714                     | 3.016                                     | 3.48E-25 |
| GmbZIP5  | Glyma.19G252600.1 | 433                     | 5979                    | 1.84171                                   | 4.13E-05 |
| GmbZIP6  | Glyma.16G029000.1 | 572                     | 5630                    | -0.2974                                   | 0.01545  |
| GmbZIP7  | Glyma.07G060400.1 | 124                     | 1339                    | 1.56869                                   | 0.01356  |
| GmbZIP8  | Glyma.13G075000.1 | 52                      | 310                     | 1.53616                                   | 4.35E-15 |
| GmbZIP9  | Glyma.16G168400.1 | 105                     | 611                     | 2.03963                                   | 1.05E-32 |
| GmbZIP10 | Glyma.02G082800.1 | 301                     | 1401                    | -5.8278                                   | 0.02356  |
| GmbZIP11 | Glyma.12G036400.1 | 1854                    | 7022                    | 1.16739                                   | 1.53E-17 |
| GmbZIP12 | Glyma.11G065000.1 | 1009                    | 3647                    | 2.16598                                   | 0.00957  |
| GmbZIP13 | Glyma.20G113600.1 | 515                     | 1567                    | 1.13623                                   | 2.16E-09 |
| GmbZIP14 | Glyma.08G183600.1 | 53                      | 140                     | -0.1335                                   | 0.01786  |
| GmbZIP15 | Glyma.10G162100.1 | 620                     | 1621                    | -0.4348                                   | 3.86E-25 |

**Supplemental Table S2.** Putative *cis*-acting elements in the 15 soybean bZIP promoters

| Gene     | ABRE | DRE | LTR | MYB | MYC | CGTCA-motif | TGACG-motif |
|----------|------|-----|-----|-----|-----|-------------|-------------|
| GmbZIP1  | 4    | 0   | 0   | 10  | 16  | 0           | 0           |
| GmbZIP2  | 10   | 2   | 1   | 5   | 16  | 1           | 3           |
| GmbZIP3  | 1    | 0   | 2   | 33  | 10  | 1           | 5           |
| GmbZIP4  | 13   | 0   | 0   | 14  | 14  | 2           | 3           |
| GmbZIP5  | 2    | 0   | 0   | 13  | 8   | 0           | 2           |
| GmbZIP6  | 4    | 0   | 0   | 12  | 10  | 1           | 2           |
| GmbZIP7  | 15   | 0   | 0   | 19  | 14  | 2           | 3           |
| GmbZIP8  | 0    | 2   | 0   | 9   | 2   | 0           | 0           |
| GmbZIP9  | 2    | 0   | 1   | 20  | 30  | 0           | 0           |
| GmbZIP10 | 4    | 3   | 3   | 29  | 12  | 1           | 2           |
| GmbZIP11 | 3    | 0   | 2   | 27  | 4   | 1           | 1           |
| GmbZIP12 | 6    | 0   | 1   | 24  | 10  | 0           | 2           |
| GmbZIP13 | 0    | 0   | 1   | 15  | 8   | 0           | 0           |
| GmbZIP14 | 3    | 1   | 1   | 14  | 10  | 0           | 0           |
| GmbZIP15 | 0    | 0   | 1   | 13  | 22  | 1           | 1           |

**Supplemental Table S3.** Functions of elements in the 15 soybean bZIPs promoter.

| Elements    | Core sequence            | Function                               |
|-------------|--------------------------|----------------------------------------|
| ABRE        | ACGTG/CGCACGTGTC/AACCCGG | ABA- and drought-responsive element    |
| DRE         | RCCGAC                   | ABA- and drought-responsive element    |
| LTR         | CCGAAA                   | Low-temperature responsiveness element |
| MYB         | C/TAACNA/G               | Drought responsive element             |
| MYC         | CANNTG                   | ABA- and drought-responsive element    |
| CGTCA-motif | CGTCA                    | MeJA responsiveness element            |
| TGACG-motif | TGACG                    | MeJA-responsiveness element            |

**Supplemental Table S5.** Primers used for gene expression analysis and vector construction

| Primer                     | F(5' to 3')                     | R(5' to 3')                     |
|----------------------------|---------------------------------|---------------------------------|
| GmbZIP1-qRT                | CCGTACGACCTTCCCATTGT            | AAGGCGAATTTGTGTCCCCA            |
| <i>GmbZIP2</i> -qRT        | GAACCTCACGAGCCAACTGA            | AGGGCAACGGATTTCGGATTT           |
| <i>GmbZIP3</i> -qRT        | GATCGTCGGAGGGAGGAGAT            | GCTCACTTCGTCGGTTAGGT            |
| <i>GmbZIP4</i> -qRT        | TCAGGCGAATCAGACCAACC            | GTGAGGAGCGTGACCAGAAG            |
| <i>GmbZIP5</i> -qRT        | TTCAGGTATGACCACCACGC            | TTTCCGCCTCTCACGTTTCA            |
| <i>GmbZIP6</i> -qRT        | GTTCCAGCGACGGAAGTGAT            | AGTCTCTTTGGAAGCCGGAC            |
| <i>GmbZIP7</i> -qRT        | GGTTACAGCGACGGAAGTGA            | AGTCTCTTTGGAAGCCGGAC            |
| <i>GmbZIP8</i> -qRT        | ATGCTCCCGATGCGTATGAG            | ACGGGAAACCTTGCTAACCA            |
| <i>GmbZIP9</i> -qRT        | CGAGCTTCTCCTCTTCGACC            | GAATCCACCGACAGACTCCG            |
| <i>GmbZIP10</i> -qRT       | AAGTTCATCGGAAAGCCGCC            | CGAAGAGGAGAAGGTCGTCG            |
| <i>GmbZIP11</i> -qRT       | TCGGCATTTCGTCAGACAA             | AAGCCTCTGCATCGCTTCTT            |
| <i>GmbZIP12</i> -qRT       | ATATGTGGGGAAGCCAGCAC            | ACCATTCTGTGTGGTGCTCA            |
| <i>GmbZIP13</i> -qRT       | GTCGAGCAATGTGGCTGTTG            | TCTCAACATGCTGGTTCCCC            |
| <i>GmbZIP14</i> -qRT       | AGACATGGCATCGTCCAAGG            | GCGTCGTTTTTCGGTCAACAA           |
| <i>GmbZIP15</i> -qRT       | CGGGCCTCTCCTTTTGTGTA            | CGGCCAGAAATGATCGGAGA            |
| <i>GmbZIP2</i>             | ATCTTTGCATTGTAACCAAGCC          | CTCTTCCCCTACCTCGATGC            |
| <i>GmbZIP2</i> -pCMBIA1302 | GGGACTCTTG <u>ACCATG</u> ATGTTT | TCAGATCT <u>ACCCATGG</u> ATGTGA |
|                            | TTCCACCAA                       | AAGCATGGT                       |
| <i>Actin (U60506)</i>      | ACATTGTTCTTAGTGGTGGCT           | CTGTTGGAAGGTGCTGAG              |
| <i>GmDHN15</i> -qRT        | TTTTGTTTTGTTGTATTGTGTAG         | GAAAAATCCTCCACCTGACGA           |
| <i>GmWD40</i> -qRT         | TGCCAGTCTCGTTAGGCTTTTC          | CTTATTGAGTTGTTGTTTGGCAG         |
| <i>GmMYB48</i> -qRT        | AACAACACTCTTCAGCCAGTTT          | GGGCAAAACAACTTTCCTCAT           |
| <i>GmGST1</i> -qRT         | CACAATGAGCAGCCCATAGCA           | CTTCAACATTCTTCTCACGCTCT         |
| <i>GmLEA</i> -qRT          | GGTGGGTGAAACCGCACAAGA           | ATGGATGCCGCCACTCCGCCAG          |

**Supplemental Table S6.** RNA-seq data analyses of 5 stress response genes.

| Gene    | Gene ID         | CK_treat-Expressi<br>on | GH_treat-Expressi<br>on | log2FoldChange(GH<br>_treat/CK_treat) | Up/Down-Re<br>gulation |
|---------|-----------------|-------------------------|-------------------------|---------------------------------------|------------------------|
| GmDHN15 | Glyma.11G149900 | 3.62041432              | 46354.88544             | 13.64427896                           | up                     |
| GmWD40  | Glyma.15G129100 | 1.33916319              | 3267.956744             | 11.25284139                           | up                     |
| GmMYB48 | Glyma.15G041100 | 23.43817295             | 3904.360652             | 7.380082399                           | up                     |
| GmGST1  | Glyma.07G139800 | 39.2812351              | 31508.76997             | 9.647697427                           | up                     |
| GmLEA   | Glyma.U018200   | 0.34561815              | 82.41961276             | 7.897664872                           | up                     |

**Supplemental Table S7.** The number of cis-acting elements that could be bound by basic leucine zipper (bZIP) transcription factors in 5 stress response genes promoter.

| Gene    | ACGT |
|---------|------|
| GmDHN15 | 21   |
| GmWD40  | 12   |
| GmMYB48 | 16   |
| GmGST1  | 8    |
| GmLEA   | 10   |
